# Supplementary material for: Management of the Elderly Patients with High-Grade Serous Ovarian Cancer in the REAL-WORLD Setting
Source: MDPI journal article supplement (doi:10.3390/curroncol28020110), 2021-03-07

Supplemental Figure 1

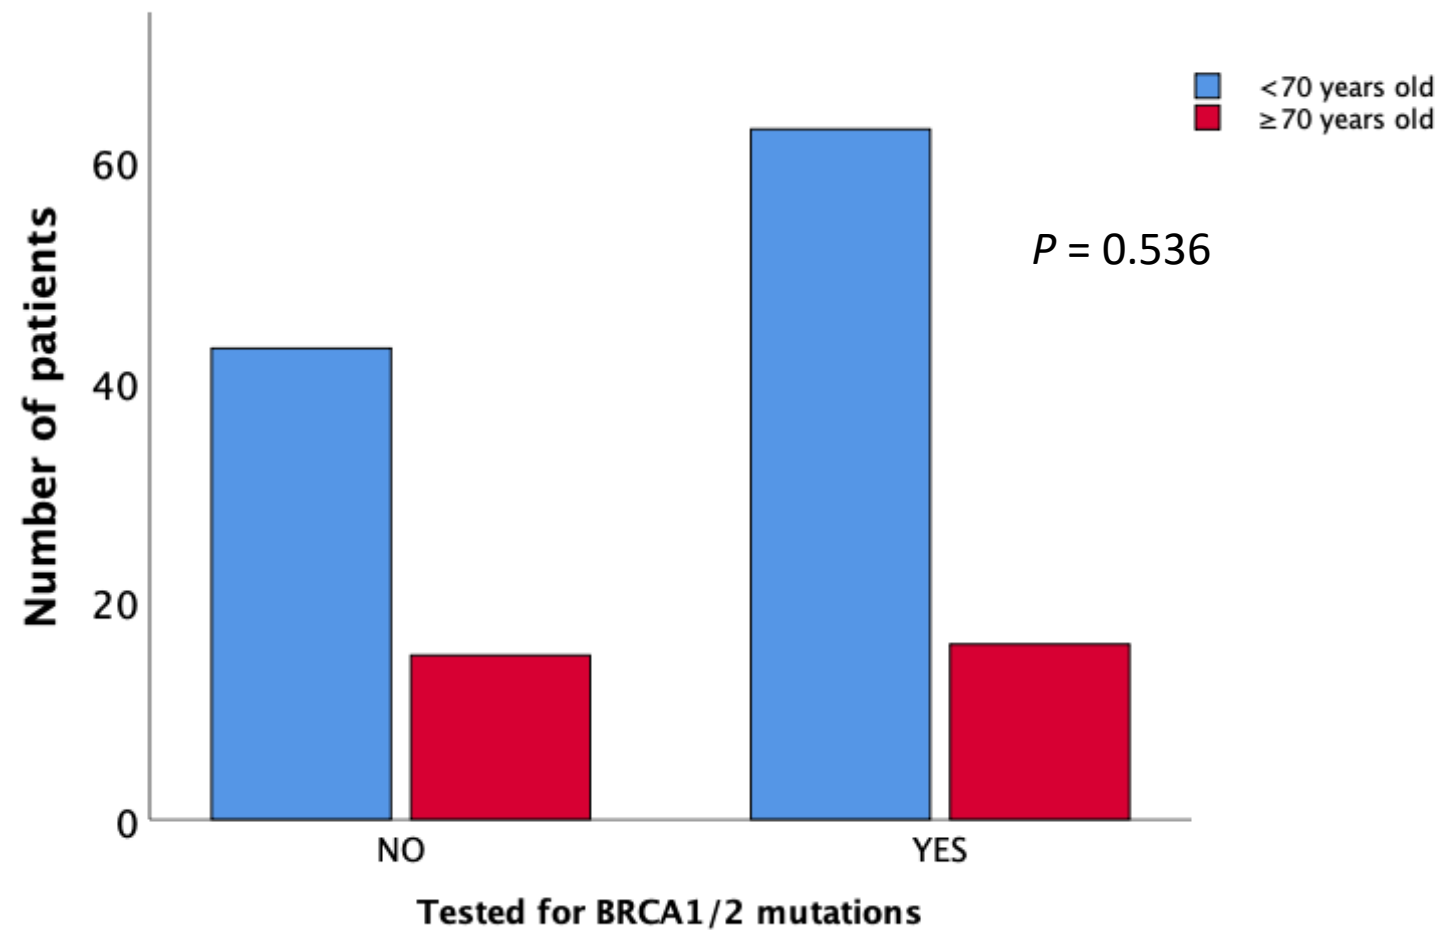

Supplement: s1 [file s1]
